# Supplementary material for: Familial hypercholesterolemia class II low-density lipoprotein receptor response to statin treatment
Source: PubMed Central journal article supplement (PMC7157586; doi:10.1242/dmm.042911), 2020-04-06
Supplement: dmm-13-042911-s1.pdf [file dmm-13-042911-s1.pdf]

# Supplementary Fig. 1

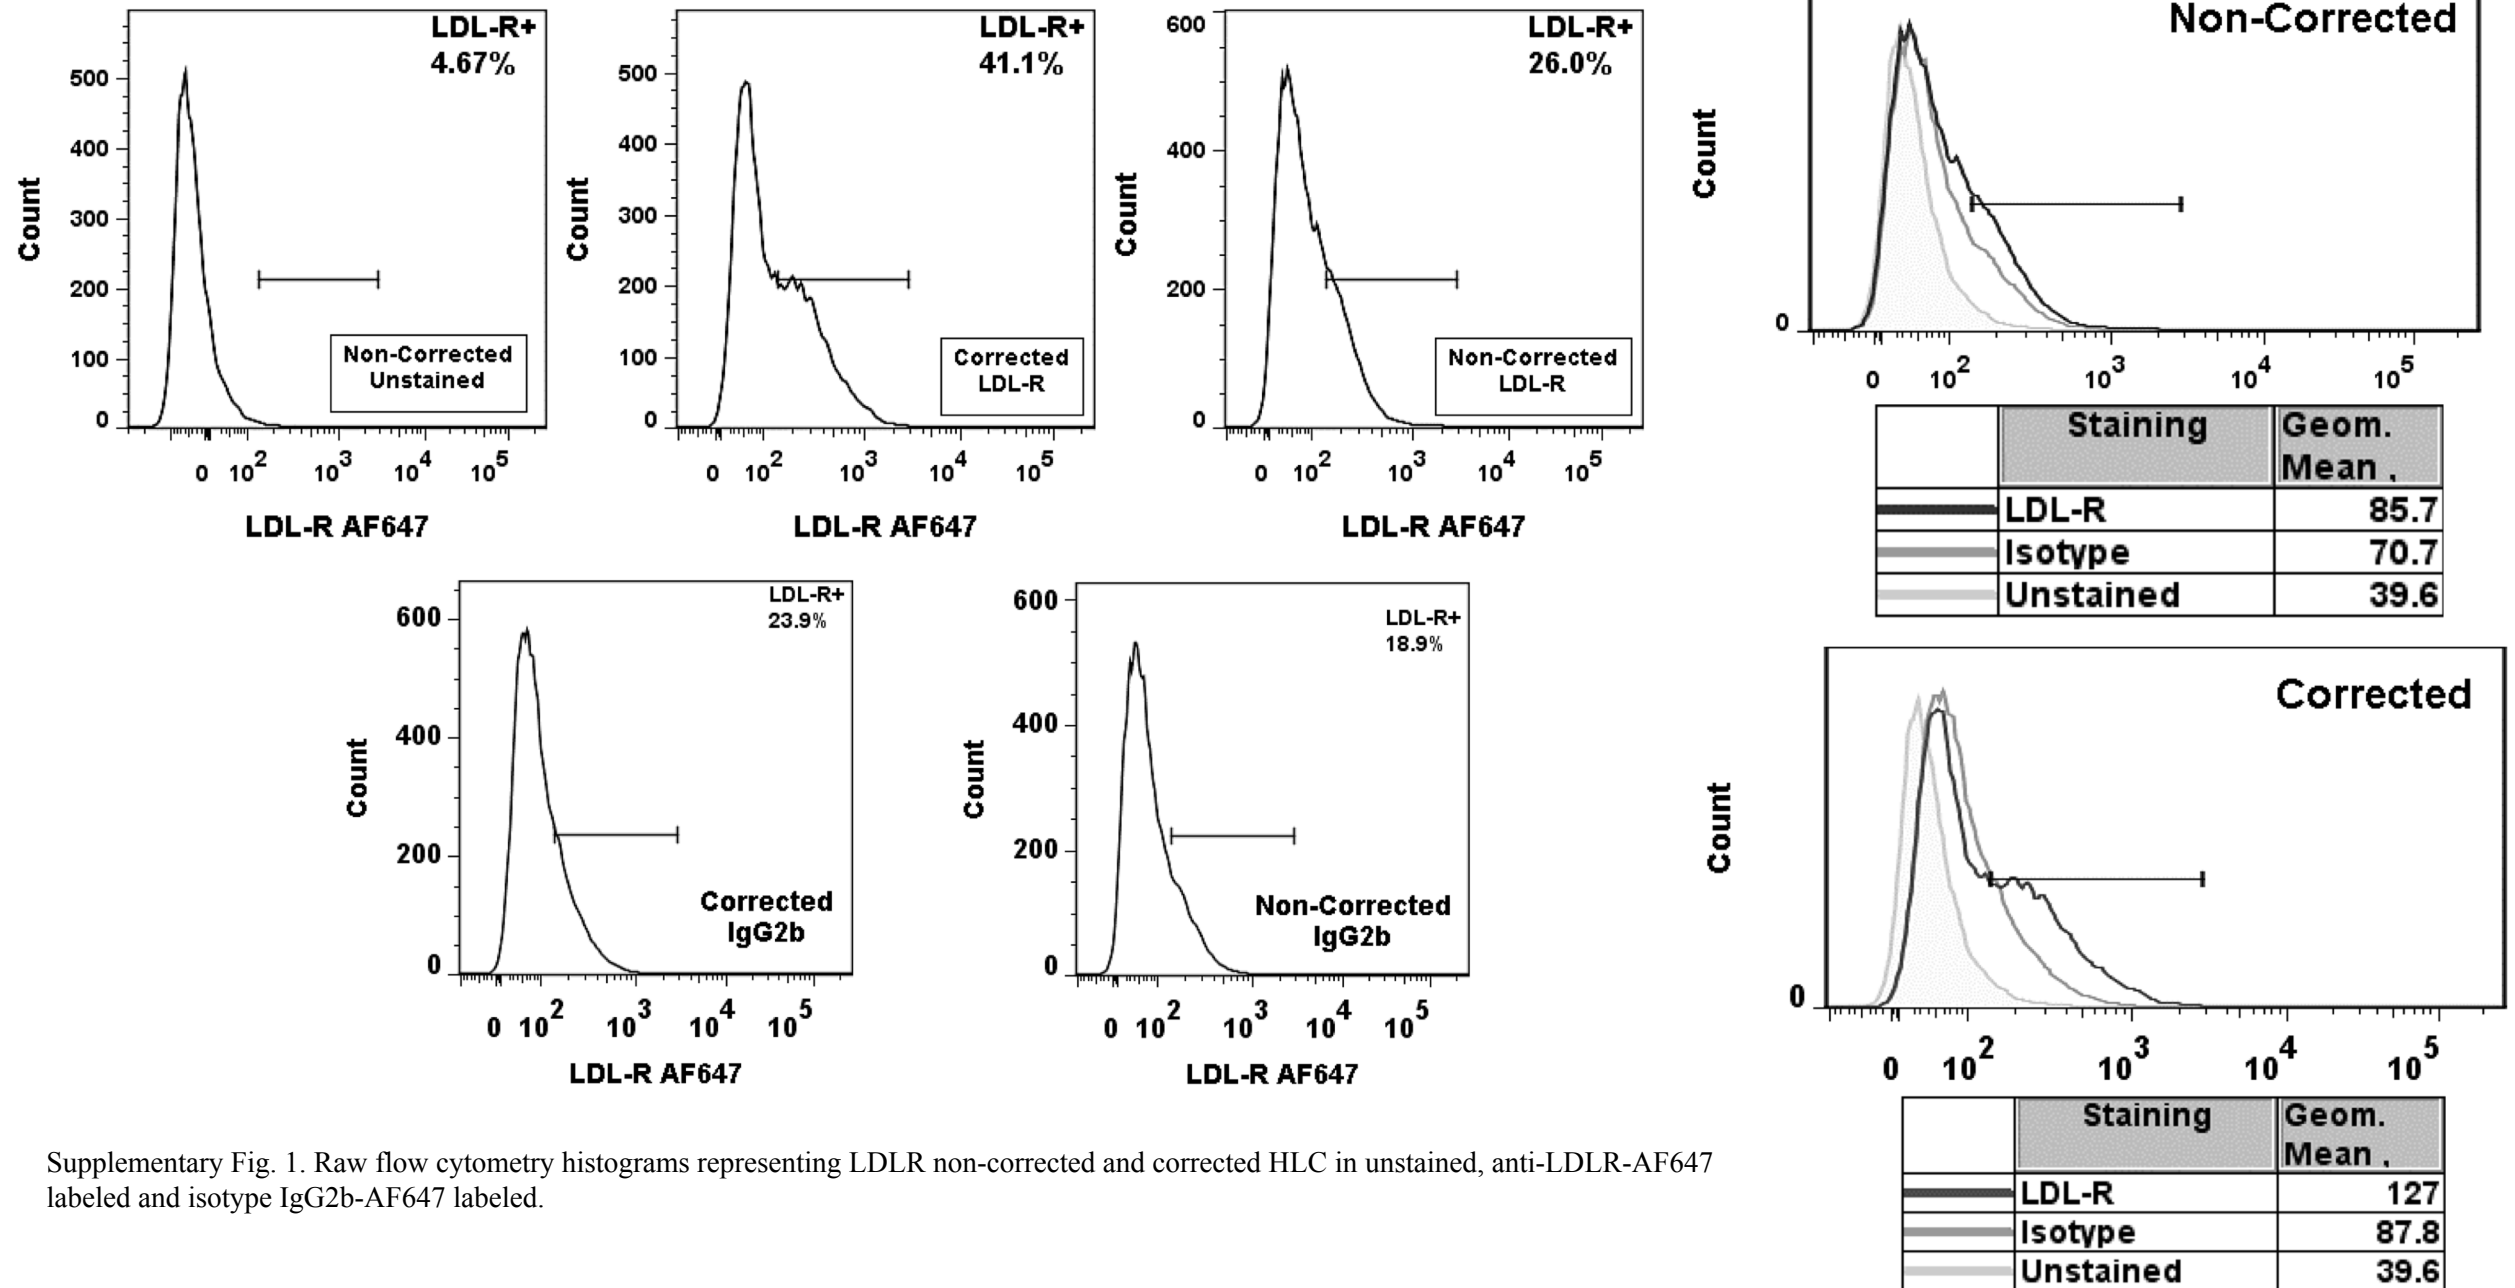

Supplementary Fig. 1. Raw flow cytometry histograms representing LDLR non-corrected and corrected HLC in unstained, anti-LDLR-AF647 labeled and isotype IgG2b-AF647 labeled.

**Table S1 List of Primers Used in qPCR/PCR**

| Gene            | Primer 1 (5' → 3')      | Primer 2 (5' → 3')    | Product Size (bp) |
|-----------------|-------------------------|-----------------------|-------------------|
| <b>LDLR</b>     | GCAGTGTGACCGGGAATATGA   | GTTGGTCCCGCACTCTTTGA  | 115               |
| <b>GRP78</b>    | CCGTTCAAGGTGGTTGAAAAGAA | TGGCGTTGGGCATCATTAAAA | 200               |
| <b>(S) XBP1</b> | CCTGGTTGCTGAAGAGGAGG    | GGCAGGCTGCTGTCCTCAT   | 150; 124          |
| <b>P0</b>       | TCGACAATGGCAGCATCTAC    | ATCCGTCTCCACAGACAAGG  | 200               |

**Table S2 List of Antibodies and Fluorophores**

| Antigen (Catalog#)                                | Lot #                        | Dilution                    | Distributor                                  |
|---------------------------------------------------|------------------------------|-----------------------------|----------------------------------------------|
| LDLR (AF2148)                                     | NA                           | 1:100 (ICC),<br>1:1000 (WB) | R&D Systems,<br>Minneapolis, MN              |
| Calnexin<br>(MAB3126)                             | 2919754                      | 1:100                       | Millipore, Billerica, MA                     |
| Beta-Actin (sc-<br>69879)                         | G1517                        | 1:1000                      | Santa Cruz<br>Biotechnology, Dallas, TX      |
| gIgG (NBP1-97057)                                 | NA                           | 1:100                       | Novus Biologicals,<br>Littleton, CO          |
| mIgG (10400C)                                     | SG255128                     | 1:100                       | Invitrogen, Carlsbad, CA                     |
| Alexa Fluor Donkey<br>Anti-Goat 488<br>(A11055)   | 1869589                      | 1:1000                      | Invitrogen                                   |
| Alexa Fluor Donkey<br>Anti-Mouse 546<br>(A10036)  | 1832039                      | 1:1000                      | Invitrogen                                   |
| HRP-Bovine Anti-<br>Goat IgG H+L<br>(805-035-180) | 138694                       | 1:5000                      | Jackson<br>ImmunoResearch, West<br>Grove, PA |
| Anti-Mouse IgG,<br>HRP-linked (7076S)             | 33                           | 1:5000                      | Cell Signaling, Danvers,<br>MA               |
| LDLR-AF647 (C7)<br>(NBP1-<br>78159AF647)          | A-3-042519-<br>AF647         | 1:50                        | Novus Biologicals                            |
| IgG2b-AF647<br>(NBP2-27228)                       | AB100711A-7-<br>042519-AF647 | 1:83                        | Novus Biologicals                            |
